# Supplementary material
Source: publisher figshare collection journal article supplement (https://gsajournals.figshare.com/ndownloader/files/17284202)
Supplement: Supplementary file 1 [file 17284202]

## Sheet: Table S4 Autosomal downregulate
Supplemental Material, Table S4. Autosomal downregulated genes in Smchd1-null mouse NPCs
name	Ensembl_ID
Pmepa1	ENSMUSG00000038400
Camkv	ENSMUSG00000032936
Cux2	ENSMUSG00000042589
9930012K11Rik	ENSMUSG00000044551
Calcrl	ENSMUSG00000059588
Vit	ENSMUSG00000024076
Cnr1	ENSMUSG00000044288
Cpne7	ENSMUSG00000034796
Tagln3	ENSMUSG00000022658
Agap2	ENSMUSG00000025422
Nell2	ENSMUSG00000022454
Psmb8
Tcf7	ENSMUSG00000000782
Ikzf4	ENSMUSG00000002578
Tnc	ENSMUSG00000028364
Snhg20	ENSMUSG00000086859
Sv2c
Sh3bp2	ENSMUSG00000054520
Ccdc184	ENSMUSG00000029875
Mb21d1	ENSMUSG00000032344
Trp53i11	ENSMUSG00000068735
Wnt4	ENSMUSG00000036856
Ddn	ENSMUSG00000059213
Rftn1
Lrrc36	ENSMUSG00000054320
Ecm2	ENSMUSG00000043631
Pdgfb	ENSMUSG00000000489
Zbtb42	ENSMUSG00000037638
Hs3st1	ENSMUSG00000051022
Trmt1	ENSMUSG00000001909
Celsr1	ENSMUSG00000016028
Nkx2-2	ENSMUSG00000027434
Arap2	ENSMUSG00000037999
Apoe	ENSMUSG00000002985
Mchr1	ENSMUSG00000050164
Sgk1	ENSMUSG00000019970
Hbegf	ENSMUSG00000024486
Cx3cl1	ENSMUSG00000031778
4930525G20Rik	ENSMUSG00000097276
Pdzrn4	ENSMUSG00000036218
Nr4a3	ENSMUSG00000028341
Mbd1	ENSMUSG00000024561
2810429I04Rik	ENSMUSG00000097709
Ccdc8
Apc2	ENSMUSG00000020135
Nagpa	ENSMUSG00000023143
Isyna1	ENSMUSG00000019139
Syngap1	ENSMUSG00000067629
Trim71
Thbs3	ENSMUSG00000028047
Dpp7	ENSMUSG00000026958
Atcay	ENSMUSG00000034958
Slc39a11	ENSMUSG00000041654
Ak5	ENSMUSG00000039058
Rbm24	ENSMUSG00000038132
Rgs7	ENSMUSG00000026527
Kcnj16	ENSMUSG00000051497
Mfap2	ENSMUSG00000060572
Efnb3	ENSMUSG00000003934
Eya2	ENSMUSG00000017897
Cemip	ENSMUSG00000052353
Slc5a3	ENSMUSG00000089774
Mical1	ENSMUSG00000019823
Epb41l4a	ENSMUSG00000024376
Rtn4rl2	ENSMUSG00000050896
S100a1	ENSMUSG00000044080
Sorbs3	ENSMUSG00000022091
Lingo3	ENSMUSG00000051067
Chrm5	ENSMUSG00000074939
Mab21l2	ENSMUSG00000057777
Pcp4l1	ENSMUSG00000038370
Phldb3	ENSMUSG00000074277
Esyt3	ENSMUSG00000037681
Adamts14	ENSMUSG00000059901
Dbndd2	ENSMUSG00000017734
Sel1l3	ENSMUSG00000029189
Syt6	ENSMUSG00000027849
Nrxn1	ENSMUSG00000024109
